# Supplementary material for: Cryo-EM reveals the architecture of placental malaria VAR2CSA and provides molecular insight into chondroitin sulfate binding
Source: PubMed Central journal article supplement (PMC8134449; doi:10.1038/s41467-021-23254-1), 2021-05-19
Supplement: 41467_2021_23254_MOESM3_ESM.pdf [file 41467_2021_23254_MOESM3_ESM.pdf]

### **Description of Additional Supplementary Files**

File Name: Supplementary Movie 1

Description: A movie showing the electrostatic potential molecular surface of the full-length VAR2CSA modeled by MDFF. The electrostatic surface is colored according to their charge and isosurfaces drawn at 3.0 (blue) and -3.0 (red) electrostatic potential in units of  $kT/e$ .
